# Supplementary material for: Preparation of a CNF porous membrane and in situ synthesis of silver nanoparticles (AgNPs)
Source: Royal Society of Chemistry journal article supplement (doi:10.1039/d4ra07142e), 2025-01-01
Supplement: d4ra07142e1.pdf [file d4ra07142e1.pdf]

-Supporting information-

***Preparation of a CNF Porous Membrane and in situ synthesis of silver nanoparticle (AgNP)***

*Yuuka Fukui*<sup>\*a</sup>, *Eriko Baba*<sup>a</sup>, *Keiji Fujimoto*<sup>\*a</sup>

<sup>a</sup> The Center for Chemical Biology, School of Fundamental Science and Technology, Graduate School of Science and Technology, Keio University, 3-14-1 Hiyoshi, Kohoku-ku, Yokohama, 223-8522, JAPAN

\*Corresponding Author. Tel: +81-45-566-1580, +81-45-566-1839

E-mail address: [fujimoto@applc.keio.ac.jp](mailto:fujimoto@applc.keio.ac.jp), [yuukafukui@applc.keio.ac.jp](mailto:yuukafukui@applc.keio.ac.jp).

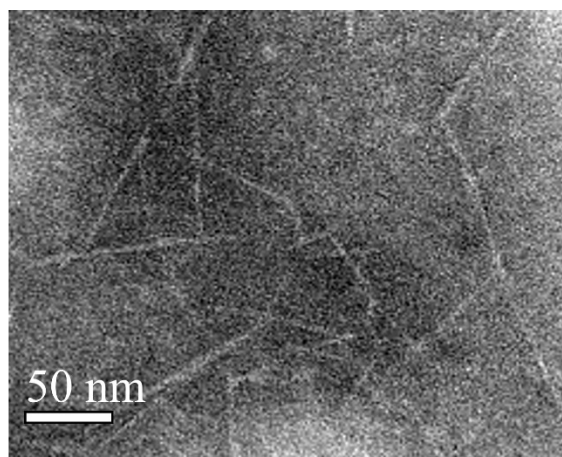

Fig. S1 TEM image of TEMPO-oxidized CNF.

The sample was negatively stained with 1% ammonium molybdate solution prior to TEM observation.

Table S1. Photo images of CNF assembly (CNF-DB) prepared by mixing CNF (2000 ppm) and DB of different concentrations in Milli-Q water.

| CNF /ppm            | 2000      |     |     |                             |     |                       |    |    |     |
|---------------------|-----------|-----|-----|-----------------------------|-----|-----------------------|----|----|-----|
| DB /mM              | 0.5       | 1.0 | 1.4 | 2.5                         | 5.0 | 10                    | 20 | 50 | 100 |
| State of suspension | Dispersed |     |     | Aggregated and precipitated |     | Formation of assembly |    |    |     |
| Photo images        |           |     |     |                             |     |                       |    |    |     |

Table. S2 Photo and OM images of CNF assembly (CNF-DB) prepared by mixing CNF (5000 or 10000 ppm) and DB of different concentrations in 50 mM NaCl aqueous solution. All scale bars are 50  $\mu\text{m}$ .

| CNF /ppm            | 5000                                                                              |                                                                                   |                                                                                   |                                                                                     |
|---------------------|-----------------------------------------------------------------------------------|-----------------------------------------------------------------------------------|-----------------------------------------------------------------------------------|-------------------------------------------------------------------------------------|
| DB /mM              | 0.25                                                                              | 2.5                                                                               | 10                                                                                | 100                                                                                 |
| State of suspension | Dispersed                                                                         |                                                                                   | Aggregated                                                                        | Formation of assembly                                                               |
| Photo               |  |  |  |  |
| OM image            |  |  |  |   |

  

| CNF /ppm            | 10000                                                                               |                                                                                     |                                                                                     |                                                                                      |
|---------------------|-------------------------------------------------------------------------------------|-------------------------------------------------------------------------------------|-------------------------------------------------------------------------------------|--------------------------------------------------------------------------------------|
| DB /mM              | 0.25                                                                                | 2.5                                                                                 | 10                                                                                  | 100                                                                                  |
| State of suspension | Dispersed                                                                           |                                                                                     | Aggregated                                                                          | Precipitated                                                                         |
| Photo               |   |   |   |  |
| OM image            |  |  |  | No datum                                                                             |



Precipitates

Table S3. Photo and SEM images of naturally dried CNF-DB<sub>x</sub> (CNF-DB<sub>x</sub>-ND). The samples were prepared by centrifugal concentration of CNF-DB assembly at 10000 r.p.m.

| DB /mM    | 5.0                                                                                 | 10                                                                                  | 50                                                                                   | 100                                                                                   |
|-----------|-------------------------------------------------------------------------------------|-------------------------------------------------------------------------------------|--------------------------------------------------------------------------------------|---------------------------------------------------------------------------------------|
| Photo     |  |  |   |  |
| SEM image |  |  |  |  |

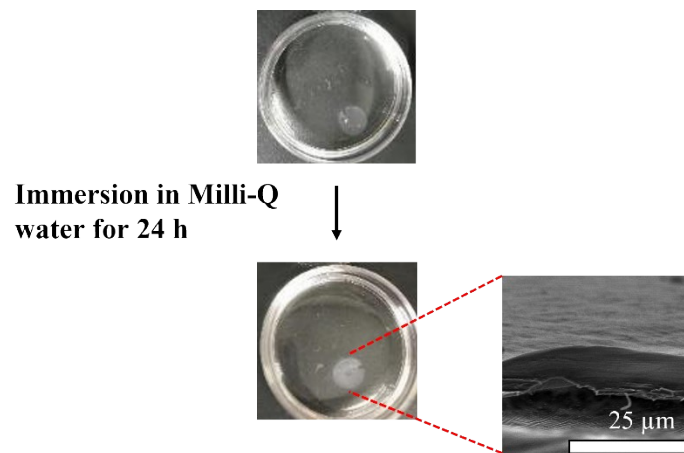

Fig. S2. Photo images showing the structural stability of CNF-DB<sub>100</sub>-ND in Milli-Q water. The inset shows its cross-sectional SEM image 24 h after immersion in Milli-Q water.

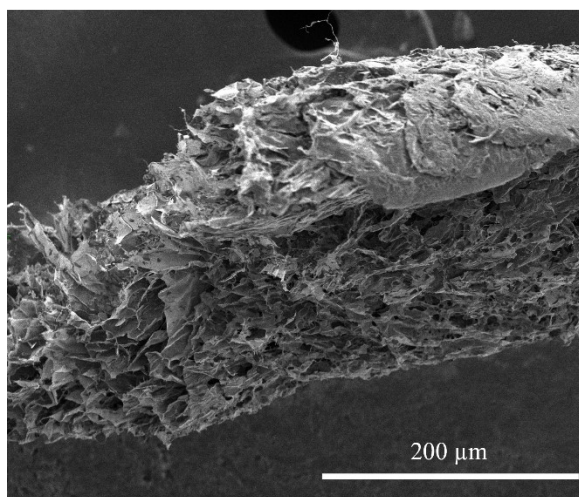

Fig. S3 SEM image showing the edge of CNF-DB<sub>5</sub>-FD.

Table S4. SEM images of CNF-DB<sub>5</sub>-FD prepared with different rotational speeds of centrifugation. All scale bars are 50 μm.

| Rotational speed /r.p.m.  | 2500               | 5000                                                                              | 10000                                                                              | 15000                                                                               |
|---------------------------|--------------------|-----------------------------------------------------------------------------------|------------------------------------------------------------------------------------|-------------------------------------------------------------------------------------|
| CNF-DB <sub>5</sub> -sol  | Sol was not formed |  |  |  |
| SEM image (surface)       | /                  |  |  |  |
| SEM image (cross section) |                    |  |  |  |
| Layer spaces /μm          |                    | 4.6 ± 2.4                                                                         | 5.6 ± 2.4                                                                          | 2.4 ± 0.9                                                                           |

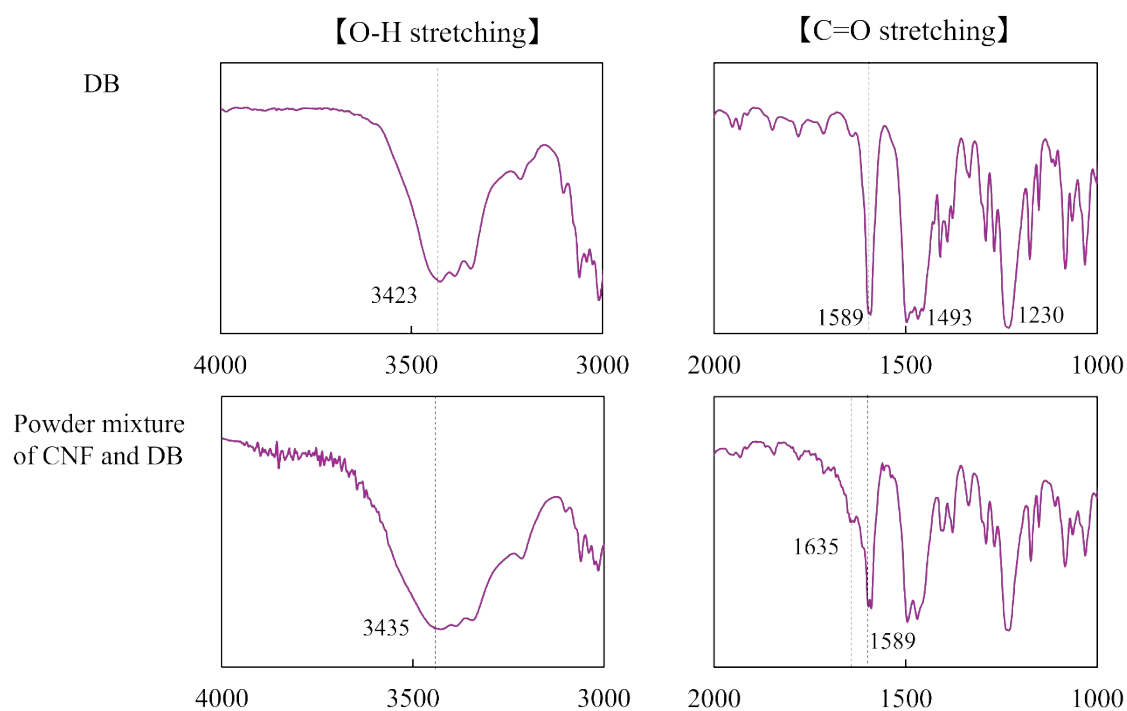

Fig. S4 FT-IR spectra of C=O stretching band (right) and O-H stretching band (left) for DB (upper) and a powder mixture of CNF and DB (lower). The numbers indicate the wavenumber corresponding to each vibration mode.

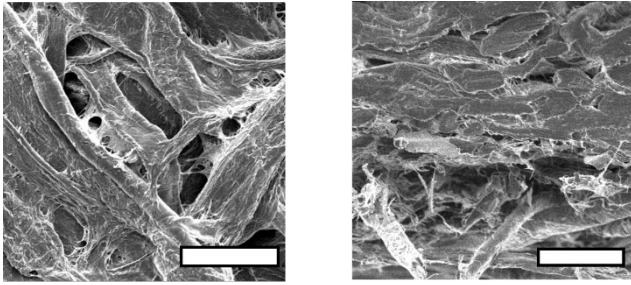

Fig. S5 SEM images of the surface (left) and the cross-section (right) of a filter paper. All scale bars are 50  $\mu\text{m}$ .

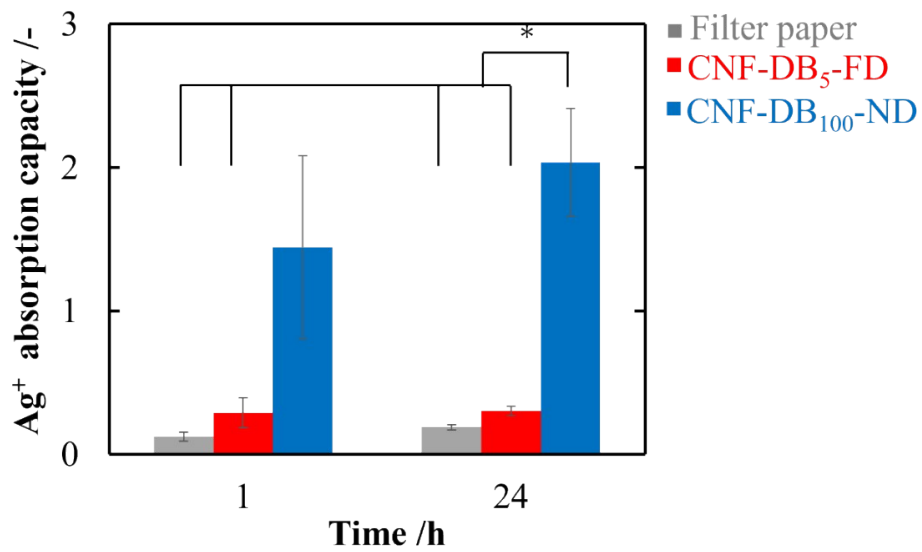

Fig. S6  $\text{Ag}^+$  absorption capacity of a filter paper, CNF-DB<sub>100</sub>-ND and CNF-DB<sub>5</sub>-FD (\* $p < 0.01$ ).

The absorption capacity was estimated using the following equation.

$$\text{Absorption capacity} = \text{Weight of absorbed Ag ions (mg)} / \text{Weight of the CNF membrane (mg)}$$

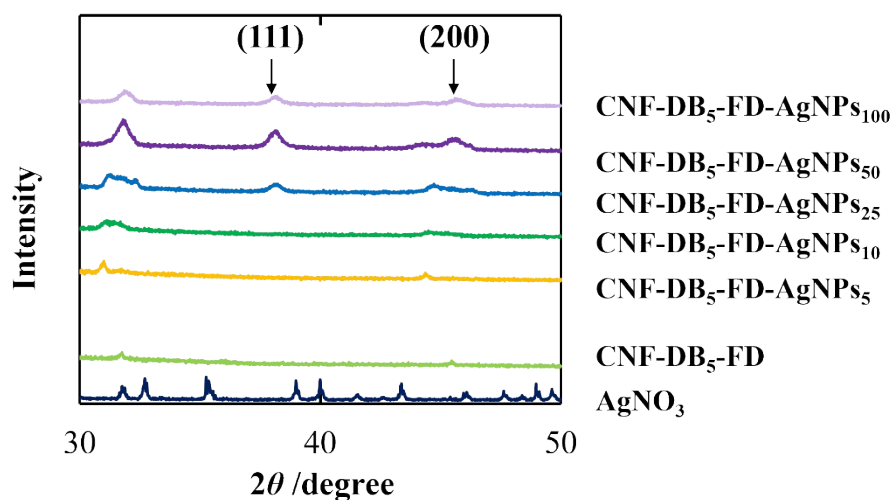

Fig. S7 XRD profiles for AgNPs generated on CNF-DB<sub>5</sub>-FD at different AgNO<sub>3</sub> concentrations using NaBH<sub>4</sub> as a reducing agent.

Table S5. Characterization of CNF-DB<sub>5</sub>-FD-AgNPs<sub>y</sub> prepared by reduction with sodium citrate under microwave irradiation for 10 min.

|                     | Ag <sup>+</sup> /mM |      |     |     |      |
|---------------------|---------------------|------|-----|-----|------|
|                     | 5.0                 | 10   | 25  | 50  | 100  |
| SEM images          |                     |      |     |     |      |
| Ag composition /wt% | 4.5                 | 10.2 | 9.9 | 8.9 | 28.1 |

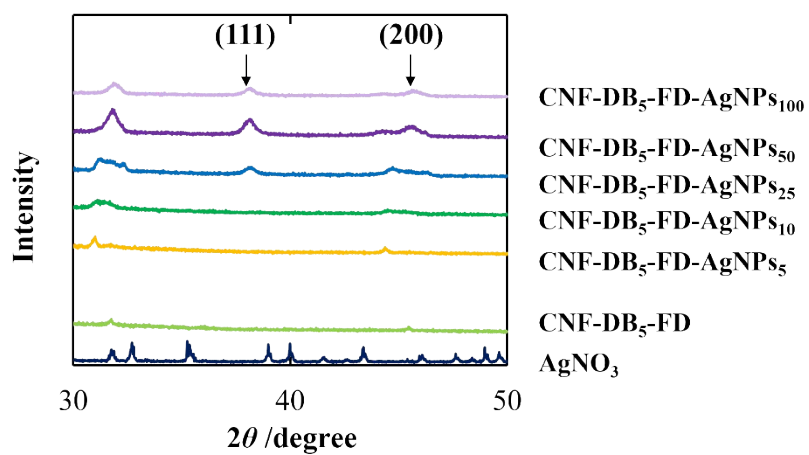

Fig. S8 XRD profiles of CNF-DB<sub>5</sub>-FD-AgNPs<sub>y</sub>, prepared by reduction with sodium citrate under microwave irradiation for 10 min.

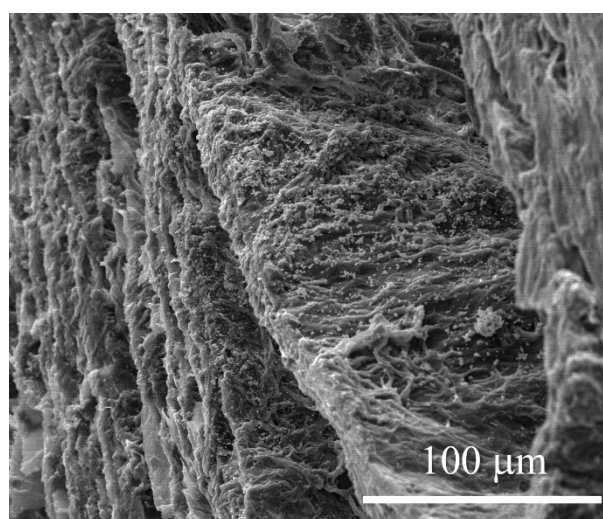

Fig. S9 SEM image of CNF-DB<sub>5</sub>-FD-AgNPs<sub>25</sub> prepared by reduction with sodium citrate under microwave irradiation for 5 min.
